# Supplementary material
Source: ML conference proceedings conference paper supplement (https://proceedings.neurips.cc/paper_files/paper/2012/hash/d395771085aab05244a4fb8fd91bf4ee-Abstract.html)
Supplement: Supplementary file 1 [file d395771085aab05244a4fb8fd91bf4ee-Supplemental.zip]

Archive with 3 entries (2 files):
- NIPS2012_0279.extra.pdf
- __MACOSX/
- __MACOSX/._NIPS2012_0279.extra.pdf
